1 **SPINT2 inhibits relevant proteases *in vitro* and *in vivo* required for activation of both influenza viruses**  
2 **and metapneumoviruses**

3

4 Marco R. Straus<sup>a</sup>, Jonathan T. Kinder<sup>b</sup>, Michal Segall<sup>a</sup>, Rebecca Ellis Dutch<sup>b</sup> and Gary R. Whittaker<sup>a</sup>

5

6 <sup>a</sup>Department of Microbiology and Immunology, College of Veterinary Medicine, Cornell University,  
7 Ithaca, New York, United States

8 <sup>b</sup>Department of Molecular and Cellular Biochemistry, University of Kentucky, Lexington, KY, United  
9 States.

10

11 Running Head: SPINT2 inhibits influenza virus and metapneumoviruses activation

12

13 #Address correspondence to Rebecca E. Dutch, [rebecca.dutch@uky.edu](mailto:rebecca.dutch@uky.edu) or Gary R. Whittaker,  
14 [gary.whittaker@cornell.edu](mailto:gary.whittaker@cornell.edu)

15

16 M.R.S and J.T.K contributed equally to this work

17

18 **Abstract**

19 Viruses that possess class I fusion proteins require proteolytic activation by host cell proteases to mediate  
20 fusion with the host cell membrane, which is a crucial step in infection. The mammalian SPINT2 gene  
21 encodes a protease inhibitor that inhibits a range of trypsin-like serine proteases, including those known  
22 to act on class I fusion proteins. Here we show the protease inhibitor SPINT2 restricts cleavage-activation  
23 with high efficacy, for a range of influenza viruses and for human metapneumovirus, and for cleavage via  
24 a series of functionally-relevant proteases: namely trypsin, recombinant matriptase, kallikrein-related

25 peptidases (KLK) 5 & 12, human-airway trypsin-like protease (HAT) and plasmin. SPINT2 inhibitor  
26 treatment resulted in the cleavage and fusion inhibition of full-length influenza A/Ca/04/09 (H1N1) HA,  
27 A/Aichi/68 (H3N2) HA and A/Shanghai/2/2013 (H7N9) HA when activated by trypsin, recombinant  
28 matriptase or KLK5. For HMPV, SPINT2 inhibitor was also able to block cleavage of F by trypsin, KLK5 and  
29 matriptase. We also demonstrate that SPINT2 inhibitor was able to reduce viral growth of influenza  
30 A/Ca/04/09 H1N1 and A/X31 H3N2 in cell culture by inhibiting matriptase or TMPRSS2. Moreover,  
31 inhibition efficacy did not differ whether SPINT2 was added at the time of infection or 24 hours post-  
32 infection. Our data suggest that the SPINT2 inhibitor has a strong potential to serve as a novel antiviral  
33 therapy with a broad spectrum.

#### 34 **Importance**

35 Respiratory viruses such as influenza A and HMPV infect millions of people each year resulting in a vast  
36 number of hospitalizations and high mortality rates. Current treatments against influenza include yearly  
37 vaccines and antiviral therapies targeting viral specific factors. Both vaccines and antiviral therapies are  
38 challenged by emerging virus strains that are resistant to these treatments. To date, there are no effective  
39 treatments available for HMPV infections. Here, we describe SPINT2, a protease inhibitor that targets  
40 trypsin-like serine host proteases which are responsible for the activation of influenza and HMPV fusion  
41 proteins. The fact that SPINT2 acts against host cell factors limits the possibility of emerging resistance  
42 phenotypes in virus strains. Given that other respiratory viruses such as MERS and SARS can be activated  
43 by similar proteases, SPINT2 could be developed into a broad-spectrum antiviral therapy against  
44 respiratory viruses that utilize class I fusion proteins.

45

#### 46 **Introduction**

47 Influenza-like illnesses (ILIs) represent a significant burden on public health and can be caused by a range  
48 of respiratory viruses in addition to influenza virus itself (1). An ongoing goal of anti-viral drug discovery

49 is to develop broadly-acting therapeutics that can be used in the absence of definitive diagnosis, such as  
50 in the case of ILIs. For such strategies to succeed, drug targets that are shared across virus families need  
51 to be identified.

52 One common cause of ILI are influenza A viruses, including H1N1 and H3N2, that cross species barriers  
53 from their natural avian hosts and infect humans (2, 3). Novel emerging viruses such as H7N9 that has  
54 caused hundreds of deaths since its appearance in China in 2013 pose an additional concern (4). The World  
55 Health Organization (WHO) estimates that each year about 1 billion suffer from flu infections, 3 to 5  
56 million people worldwide are hospitalized with severe illness and approximated 290,000 to 650,000  
57 people die from the disease (5). Mortality rates dramatically rise during influenza pandemics as observed  
58 with the Spanish flu of 1918, the Asian pandemic of 1957 and the Hong Kong pandemic of 1968 (3, 6).  
59 Vaccinations can provide an effective protection against seasonal and pandemic outbreaks but provide  
60 limited or no protection when viruses evolve and/or acquire mutations resulting in antigenically distinct  
61 viruses. This antigenic drift or shift requires that new vaccines be produced quickly and in vast amounts  
62 which can be problematic especially during pandemics. In addition to vaccines, several antiviral therapies  
63 have been applied to treat influenza A infections such as adamantanes acting as M2 ion channel blockers  
64 (amantadine, rimantadine) and neuraminidase inhibitors which block the cleavage of sialic acid in newly  
65 formed virions (oseltamivir, zanamivir) (7). However, several influenza subtypes including the most  
66 common H1N1 and H3N2 have emerged globally that are resistant against adamantanes and similar  
67 observations were made with respect to oseltamivir (7).

68 Another common cause of ILI is pneumo- and paramyxoviruses, including human metapneumovirus  
69 (HMPV), respiratory syncytial virus, and parainfluenza viruses. Clinical presentation of these viruses  
70 resembles many of the symptoms of influenza and they cause significant morbidity and mortality as well  
71 as a large economic burden (8, 9). HMPV is ubiquitous, with nearly everyone infected by the age of 5 and  
72 reinfection is common throughout life impacting children, elderly and immunocompromised individuals

73 (10–12). While HMPV is a common cause of ILI, there are currently no approved vaccines or antiviral  
74 therapeutics. Further research is needed to establish targets for intervention and factors required for  
75 infection need to be examined in more detail.

76 Some influenza viruses and HMPV appear to share common activating proteases. The influenza fusion  
77 protein hemagglutinin (HA) is synthesized as a precursor that needs to be cleaved by host cell proteases  
78 to exert its fusogenic activity (13, 14). Cleavage separates the precursor HA<sub>0</sub> into HA<sub>1</sub> and HA<sub>2</sub> which  
79 remain associated via disulfide bonds and leads to exposure of the fusion peptide at the N-terminus of  
80 HA<sub>2</sub> (13, 14). Low pathogenicity avian influenza (LPAI) usually possess a monobasic cleavage site which  
81 consists of 1 – 2 non-consecutive basic amino acids and which is generally cleaved by trypsin-like serine  
82 proteases such trypsin, and members of the type II transmembrane serine proteases (TTSP) including  
83 TMPRSS2, TMPRSS4, HAT (TMPRSS11D) and matriptase (13–15). In addition, some other proteases such  
84 as KLK5 and KLK 12 have been implicated in influenza pathogenicity (16). In humans these proteases are  
85 localized in the respiratory tract and therefore influenza infections are usually confined to this tissue. In  
86 contrast, highly pathogenic avian influenza (HPAI) viruses are defined by a polybasic cleavage site which  
87 consists of 6 – 7 basic residues allowing them to be activated by members of the proprotein convertase  
88 (PC) family such as furin and PC6 (17). These proteases are not confined to a specific tissue and  
89 dramatically increase the risk of a systemic infection.

90 Similar to influenza HA, HMPV requires the fusion protein (F) to be proteolytically processed at a single  
91 basic residue to generate the active, metastable form. Without this cleavage process, the F protein is  
92 unable to mediate viral entry into the target cell. However, to date, only trypsin and TMPRSS2 have been  
93 shown to effectively cleave HMPV F and other proteases have yet to be identified (18, 19).

94 In addition, other respiratory viruses have been reported to utilize similar proteases for activation,  
95 including SARS and MERS, demonstrating that targeting these proteases would inhibit multiple respiratory  
96 pathogens (20). The fact that proteolytic activation is such a crucial step for several respiratory viruses

97 that predominately require a specific class of proteases makes these proteases a viable target for the  
98 development of novel antiviral therapies (21). Earlier studies described the administration of the serine  
99 protease inhibitor aprotinin to inhibit influenza replication and demonstrated that aprotinin successfully  
100 inhibited IAV activation and replication (22). However, when targeting host specific factors there are  
101 potential off target effects, and therefore the potential side effects of targeting host proteases requires  
102 further investigation. Hamilton et al. reported that the hepatocyte growth activator inhibitor 2 (HAI-2)  
103 effectively inhibited trypsin-mediated cleavage of H1N1 and H3N2 *in vitro* and *in vivo* (23). HAI-2 is  
104 encoded by the SPINT2 gene and hereafter we will also refer to the protein as SPINT2. SPINT2 is plasma  
105 membrane-localized serine protease inhibitor that is found in various tissues including the respiratory  
106 tract (24). Recent reports associated the physiological role of SPINT2 with the inhibition of serine-type  
107 proteases such as matriptase and plasmin and that deregulation of SPINT2 inhibition is suggested to play  
108 a role in cancer development and progression (25–27). SPINT2 possesses two kunitz-type inhibitor  
109 domains that are exposed to the extracellular space and which are believed to facilitate a potent inhibition  
110 of target proteases. Wu et al. recently described that the kunitz-type domain 1 of SPINT2 is responsible  
111 for matriptase inhibition (25).

112 A previous study from our lab described the effective inhibition of trypsin by SPINT2 resulting in  
113 dramatically reduced cleavage of influenza A HA and subsequent reduced viral growth in cell culture and  
114 mouse studies (23). Here, we report that purified SPINT2 protein inhibits several human host proteases  
115 such as matriptase and TMPRSS2 that are relevant for the activation of significant influenza viruses  
116 currently circulating and causing disease outbreaks. We also tested the potential of SPINT2 to inhibit the  
117 activation of the fusion protein (F) from human metapneumovirus (HMPV), a member of the pneumovirus  
118 family. We confirm the original findings that HMPV F is proteolytically processed by trypsin and TMPRSS2.  
119 In addition, we found that HAT, KLK5 and matriptase were able to cleave F, but KLK12 could not. Our  
120 results show that SPINT2 can inhibit the activation of proteases that are responsible for the activation of

121 influenza H1N1, H3N2 and H7N9 HA as well as HMPV F. In a cell culture model, we demonstrate that viral  
122 loads are significantly reduced in the presence of SPINT2 when infections were conducted with  
123 A/Ca/04/09 and A/X31. Moreover, the application of SPINT2 24 hours post infection inhibited the  
124 activation of influenza A viruses with the same efficacy as when SPINT2 was added to cell culture medium  
125 at the time of infection. Thus, SPINT2 exhibits the potential to serve as a novel and efficient antiviral  
126 therapeutic to relieve patients from influenza A, human metapneumovirus, SARS and potentially other  
127 respiratory viruses that require these host factors for entry.

## 128 **Results**

### 129 **SPINT2 inhibits recombinant human respiratory tract proteases that cleave HA cleavage site peptide** 130 **mimics**

131 We previously tested the ability of SPINT2 to inhibit proteases shown to cleave HAs from seasonal and  
132 pandemic influenza A strains that infected humans by using a fluorogenic peptide cleavage assay that  
133 utilizes fluorogenic peptides mimicking the HA cleavage site (28, 29). We found that certain HA subtypes  
134 such as H1, H2 and H3 are cleaved by a wide variety of human respiratory proteases while others such H5,  
135 H7 and H9 displayed more variability in cleavage by proteases and seemed less well adapted to proteases  
136 present in the human respiratory tract (29). Here, we extended our previous study and tested a peptide  
137 mimicking the cleavage site of the pneumovirus fusion protein of HMPV F with a variety of proteases for  
138 their ability to cleave the peptide mimic (Figure 1) (19, 30). When we tested cleavage of a peptide  
139 mimicking the HMPV F cleavage site by trypsin, matriptase, KLK5, KLK12, HAT and plasmin we found that  
140 all proteases except KLK12 were able to proteolytically cleave the peptide (Figure 1). However, the Vmax  
141 values for matriptase (9.24 nM), KLK5 (5.8 nM) and HAT (2.99 nM) were very low compared to trypsin  
142 (135.2) suggesting that the three proteases have a lower affinity interaction and processivity for HMPV F.  
143 Next, trypsin, matriptase and KLK5 were selected for the SPINT2 inhibition assays as described below.

144 For the SPINT2 inhibition assays, trypsin which typically resides in the intestinal tract and expresses a very  
145 broad activity towards different HA subtypes and HMPV F served as a control (31). We measured the  $V_{max}$   
146 values for each protease/peptide combination in the presence of different SPINT2 concentrations and  
147 plotted the obtained  $V_{max}$  values against the SPINT2 concentrations on a logarithmic scale  
148 (Supplementary Figure 1). Using Prism7 software, we then determined the  $IC_{50}$  that reflects at which  
149 concentration the  $V_{max}$  of the respective reaction is inhibited by half. SPINT2 cleavage inhibition of a  
150 representative H1N1 cleavage site by trypsin results in an  $IC_{50}$  value of 70.6 nM (Table 1A) while the  
151 inhibition efficacy of SPINT2 towards matriptase, HAT, KLK5 and KLK12 ranged from 11 nM to 25 nM (Table  
152 1A). However, inhibition was much less efficient for plasmin compared with trypsin (122 nM). We  
153 observed a similar trend when testing peptides mimicking the H3N2 and H7N9 HA cleavage sites using  
154 trypsin, HAT, KLK5, plasmin and trypsin, matriptase, plasmin, respectively (Table 1A). With the exception  
155 of plasmin, we found that human respiratory tract proteases are inhibited with a higher efficacy compared  
156 to trypsin. We expanded our analysis to peptides mimicking HA cleavage sites of H2N2, H5N1 (LPAI and  
157 HPAI), H6N1 and H9N2 that all reflected the results described above (Table 1A). Only cleavage inhibition  
158 of H6N1 HA by KLK5 did not significantly differ from the observation made with trypsin (Table 1A).  
159 When we tested inhibition of HMPV cleavage by trypsin, matriptase and KLK5. SPINT2 showed a very high  
160 inhibition efficacy for all three tested proteases with measured  $IC_{50}$ s for trypsin, matriptase and KLK5 of  
161 0.04 nM, 0.0003 nM and 0.95 nM, respectively (Table 1B). Compared to the  $IC_{50}$  values observed with the  
162 peptides mimicking influenza HA cleavage site motifs the  $IC_{50}$  values for the HMPV F peptide were very  
163 low.

#### 164 **Cleavage of distinct full-length HA subtypes is efficiently inhibited by SPINT**

165 Cleavage of peptides mimicking a HA cleavage site does not always reflect the *in vivo* situation and  
166 requires validation by expressing the full-length HA protein in a cell culture model to test cleavage and  
167 cleavage inhibition of the respective protease (29). However, before conducting these experiments we

168 wanted to ensure that SPINT2 does not have a cytotoxic effect on cells. Therefore, 293T cells were  
169 incubated with various concentrations of SPINT2 over a time period of 24 hours. PBS and 500 $\mu$ M H<sub>2</sub>O<sub>2</sub>  
170 served as cytotoxic negative and positive controls respectively. We did not observe any cytotoxicity with  
171 any of the tested SPINT2 concentrations (Figure 2).

172 To test SPINT2-mediated cleavage inhibition of full-length HA we expressed the HAs of A/Ca/04/09  
173 (H1N1), A/x31 (H3N2) and A/Shanghai/2/2013 (H7N9) in 293T cells and added recombinant matriptase or  
174 KLK5 protease that were pre-incubated with 10nM or 500nM SPINT2. Trypsin and the respective protease  
175 without SPINT2 incubation were used as controls. Cleavage of HA<sub>0</sub> was analyzed via Western Blot and the  
176 signal intensities of the HA<sub>1</sub> bands were quantified using the control sample without SPINT2 incubation as  
177 a reference point (Figure 3A and 3B-D). Trypsin cleaved all tested HA proteins with very high efficiency  
178 that was not observed with matriptase or KLK5 (Figure 3B-D). However, H1N1 HA was cleaved by  
179 matriptase and KLK5 to a similar extent without and with 10nM SPINT2. 500nM SPINT2 led to a cleavage  
180 reduction of about 70% and 50% for matriptase and KLK5, respectively (Figure 3A and 3B). KLK5-mediated  
181 cleavage of H3N2 HA was reduced by about 10% when KLK5 was pre-incubated with 10nM SPINT2 and by  
182 about 60% when 500nM SPINT2 was used (Figure 3A and 3C). When we tested the cleavage inhibition of  
183 matriptase with H7N9 HA as a substrate we found that 10nM and 500nM SPINT reduced the cleavage to  
184 40% and 10% cleavage respectively compared to the control. (Figure 3A and 3D). In contrast, 10nM SPINT2  
185 had no effect on KLK5-mediated cleavage of H7N9 HA while 500nM reduced cleavage by approximately  
186 70% (Figure 3A and 3D).

187 Next, we examined which proteases in addition to trypsin and TMPRSS2 were able to cleave HMPV F. First,  
188 we co-transfected the full length TMPRSS2, HAT and matriptase with HMPV F in VERO cells. The F protein  
189 was then radioactively labeled with <sup>35</sup>S methionine and cleavage was examined by quantifying the F<sub>0</sub> full  
190 length protein and the F<sub>1</sub> cleavage product. We found that TMPRSS2 and HAT were able to efficiently  
191 cleave HMPV F while matriptase decreased the expression of F, though it is not clear if this was due to



192 general degradation of protein or lower initial expression. However, matriptase demonstrated potential  
193 low-level cleavage when co-transfected (Figure 4A and B). We then examined cleavage by the exogenous  
194 proteases KLK5, KLK12 and matriptase. Compared with the trypsin control, KLK5 and matriptase were able  
195 to cleavage HMPV F, while KLK12 was not (Figure 4C and D). In agreement with the peptide assay, cleavage  
196 of HMPV F by KLK5 and matriptase was less efficient than trypsin and both peptide and full length protein  
197 assays demonstrate that KLK12 does not cleave. This also serves as confirmation that matriptase likely  
198 cleaves HMPV F, but co-expression with matriptase may alter protein synthesis, stability or turnover if co-  
199 expressed during synthesis and transport to the cell surface. Next, we tested SPINT2 inhibition of  
200 exogenous proteases trypsin, KLK5 and matriptase. We pre-incubated SPINT2 with each protease and  
201 added it to VERO cells expressing HMPV F and analyzed cleavage product formation. SPINT2 pre-  
202 incubation minimally affected cleavage at 10nM but 500nM resulted in inhibition of trypsin, KLK5 and  
203 matriptase cleavage of HMPV, similar to our findings for HA (Figure 4E and F).

204 We also tested whether cleavage inhibition by SPINT2 resulted in the inhibition of cell fusion. As described  
205 above, matriptase and KLK5 were pre-incubated with 10nM and 500nM SPINT2 and subsequently added  
206 to VERO cells expressing A/Ca/04/09 (H1N1) HA or A/Shanghai/2/2013 (H7N9) HA. Cells were then briefly  
207 exposed to a low pH buffer to induce fusion and subsequently analyzed using an immune fluorescence  
208 assay. When matriptase and KLK5 were tested with 10nM SPINT2 and incubated with VERO cells  
209 expressing H1N1 HA we still observed syncytia formation (Figure 5A). However, 500mM SPINT2 resulted  
210 in the abrogation of syncytia formation triggered by cleavage of the respective HA by matriptase and KLK5.  
211 We made the same observation when we tested KLK5 and H7N9 HA (Figure 5B). Matriptase-mediated  
212 H7N9 HA syncytia formation was inhibited by the addition of 10nM SPINT2 (Figure 5B).

### 213 **SPINT2 reduces viral growth in cell culture**

214 To understand whether SPINT2 was able to inhibit or reduce the growth of live virus in a cell culture model  
215 over the course of 24 hours we transfected cells with human TMPRSS2 and human matriptase, two major

216 proteases that have been shown to be responsible for the activation of distinct influenza A subtype  
217 viruses. TMPRSS2 is essential for H1N1 virus propagation in mice and plays a major role in the activation  
218 of H7N9 and H9N2 viruses (32–34). Matriptase cleaves H1N1 HA in a sub-type specific manner, is involved  
219 in the *in vivo* cleavage of H9N2 HA and our results described above suggest a role for matriptase in the  
220 activation of H7N9 (16, 34). At 18 hours post transfection we infected MDCK cells with A/Ca/04/09 (H1N1)  
221 at a MOI of 0.1 and subsequently added SPINT2 protein at different concentrations. Non-transfected cells  
222 served as a control and exogenous trypsin was added to facilitate viral propagation. SPINT2 initially  
223 mitigated trypsin-mediated growth of H1N1 at a concentration of 50nM and the extent of inhibition  
224 slightly increased with higher concentrations (Figure 6A, Table 2A). The highest tested SPINT2  
225 concentration of 500nM reduced viral growth by about 1 log (Figure 6A, Table 2A). We observed a similar  
226 pattern with cells transfected with human matriptase (Figure 6B, Table 2A). Growth inhibition started at  
227 a SPINT2 concentration of 50nM and with the application of 500nM growth was reduced by approximately  
228 1.5 logs (Figure 6B, Table 2A). When we infected cells expressing TMPRSS2 with H1N1 and added SPINT2,  
229 viral growth was significantly reduced at a concentration of 150nM. Addition of 500nM SPINT2 led to a  
230 reduction of viral growth of about 1.5 logs (Figure 6C, Table 2A). We also tested whether SPINT2 could  
231 reduce the growth of a H3N2 virus because it is major circulating seasonal influenza subtype. However,  
232 TMPRSS2 and matriptase do not seem to activate H3N2 viruses (16, 35). Hence, trypsin and SPINT2 were  
233 added to the growth medium of cells infected with A/X31 H3N2. Compared to control cells without added  
234 inhibitor SPINT2 significantly inhibited trypsin-mediated H3N2 growth at a concentration of 50nM (Figure  
235 6D, Table 2A). At the highest SPINT2 concentration of 500nM viral growth was reduced by about 1 log  
236 (Figure 6D).

237 Antiviral therapies are often applied when patients already show signs of disease. Therefore, we tested if  
238 SPINT2 was able to reduce viral growth when added to cells 24 hours after the initial infection. Cells were  
239 infected with 0.1 MOI of A/Ca/04/09 (H1N1) and trypsin was added to promote viral growth. At the time

240 of infection, we also added 500nM SPINT2 to one sample. A second sample received 500nM SPINT2 24  
241 hours post infection. Growth supernatants were harvested 24 hours later, and viral growth was analyzed.  
242 We found that viral growth was reduced by 1 log regardless whether SPINT2 was added at the time of  
243 infection or 24 hours later (Figure 7, Table 2B).

## 244 **Discussion**

245 Influenza A has caused four pandemics since the early 20<sup>th</sup> century and infects millions of people each  
246 year as seasonal flu resulting in up to 690,000 deaths annually (5). Vaccination efforts have proven to be  
247 challenging due to the antigenic drift of the virus and emerging resistance phenotypes (36). Moreover,  
248 the efficacy of vaccines seems to be significantly reduced in certain high-risk groups (37). Prevalent  
249 antiviral therapies to treat influenza A-infected patients such as adamantanes and neuraminidase  
250 inhibitors target viral proteins but there is increasing number of reports about circulating influenza A  
251 subtypes that are resistant to these treatments (7). In this study we focused on a novel approach that uses  
252 antiviral therapies targeting host factors rather than viral proteins offering a more broad and potentially  
253 more effective therapeutic approach (21). We demonstrate that SPINT2, a potent inhibitor of serine-type  
254 proteases, is able to significantly inhibit cleavage of HA, impair the fusion of cells and hence, reduce viral  
255 growth *in vivo*.

256 SPINT2 demonstrates greater advantage over other inhibitors of host proteases such as e.g. aprotinin that  
257 was shown to be an effective antiviral but also seemed to be specific only for a subset of proteases (22).  
258 Our peptide assay suggests that SPINT2 has a wide variety of host protease specificity. With the exception  
259 of plasmin, all the tested proteases in combination with peptides mimicking the cleavage site of different  
260 HA subtypes expressed IC<sub>50</sub> values in the nanomolar range. Interestingly, the IC<sub>50</sub> values obtained for  
261 cleavage inhibition of HMPV F were substantially lower, in the picomolar range. This suggests that the  
262 HMPV cleavage may be more selectively inhibited by SPINT2. However, the western blot data showed  
263 that addition of the lowest concentration (10 nM) of SPINT2 did not result in cleavage inhibition of HMPV

264 F by the tested proteases. Differences in sensitivity of SPINT2 between influenza HA and HMPV require  
265 further investigation.

266 SPINT2 poses several potential advantages over other inhibitors that target host proteases. Cell culture  
267 studies showed that, for example, matriptase-mediated H7N9 HA cleavage was efficiently inhibited at a  
268 concentration of 10nM SPINT2. In contrast, the substrate range for aprotinin, a serine protease inhibitor  
269 shown to reduce influenza A infections by targeting host proteases, seemed to be more limited (22). Other  
270 synthetic and peptide-like molecules designed to inhibit very specific serine proteases such as TMPRSS2,  
271 TMPRSS4 and TMPRSS11D (HAT) were only tested with those proteases and their potential to inhibit other  
272 proteases relevant for influenza A activation remains unclear (38–40). However, when we tested the  
273 potential of SPINT2 to inhibit viral replication in a cell culture model we were only able to achieve growth  
274 reductions of approximately 1 -1.5 logs after 48 hours with a concentration of 500nM SPINT2. One  
275 potential explanation is that 500nM SPINT2 was unable to saturate the proteases present in the individual  
276 experiments and was not sufficient to prevent viral growth. In addition, the continuous overexpression of  
277 matriptase and TMPRSS2 may have produced an artificially high quantity of protein that exceeded the  
278 inhibitory capacities of SPINT2. This problem could be solved either by using higher concentration of  
279 SPINT2 or by optimizing its inhibitory properties. SPINT2 did not express any cytotoxic effects up to a  
280 concentration of 10mM. In comparison with other studies, the SPINT2 concentration we used here were  
281 in the nanomolar range while other published inhibitors require micromolar concentrations (38–40).  
282 However, we believe that future research will allow to fully exploit the potential of SPINT2 as a broad-  
283 spectrum antiviral therapy. Wu et al., recently described that the Kunitz domain I of SPINT2 is responsible  
284 for the inhibition of matriptase (25). In future studies we will explore whether the inhibitory capabilities  
285 of SPINT2 can be condensed into small peptides that may improve its efficacy. Its ability to inhibit a broad  
286 range of serine protease that are involved in the activation of influenza A suggest that a SPINT2 based  
287 antiviral therapy could be efficient against other pathogens too. TMPRSS2, for example, does not only

288 play a major role in the pathogenesis of H1N1 but is also required for the activation of SARS (Severe Acute  
289 Respiratory Syndrome) and MERS (Middle East Respiratory Syndrome) coronaviruses and HMPV (41, 42).  
290 Currently, treatment options for these viruses are very limited and therefore SPINT2 could become a  
291 viable option if its potential as an antiviral therapeutic can be fully exploited.

## 292 **Materials and Methods**

### 293 **Cells, plasmids, viruses, and proteins**

294 293T, VERO and MDCK cells (American Type Culture Collection) used for influenza experiments were  
295 maintained in Dulbecco's modified Eagle medium (DMEM) supplemented with 25 mM HEPES (Cellgro)  
296 and 10% fetal bovine serum (VWR). VERO cells used for HMPV experiments were maintained in DMEM  
297 (HyClone) supplemented with 10% FBS (Sigma). The plasmid encoding A/Ca/04/09 (H1N1) HA was  
298 generated as described (16). The plasmid encoding for HMPV F S175H434 was generated as described(43).  
299 The plasmids encoding for A/Shanghai/2/2013 (H7N9) HA, human TMPRSS2 and human matriptase were  
300 purchased from Sino Biological Inc. The plasmid encoding for A/Aichi/2/68 (H3N2) HA was generously  
301 donated by David Steinhauer. A/Ca/04/09 and A/X31 viruses were propagated in eggs. All recombinant  
302 proteases were purchased as described (29).

### 303 **Expression and purification of SPINT2**

304 SPINT2 was expressed and purified as described with minor modification (23). In brief, *E. coli* RIL (DE3)  
305 arctic express cells (Agilent) were transformed with SPINT2-pSUMO. Cells were then grown in 0.5 L Luria  
306 Broth containing 50 µg/ml kanamycin at 37°C. At OD 0.5-0.6 cells were chilled on ice and protein  
307 expression was induced with 0.2 mM IPTG. Cells were then grown over night at 16°C. Cells were harvested  
308 and protein was purified as previously described (23). SPINT2 protein was eluted by a 1-hour incubation  
309 with ULP1-6xHis. Glycerol was added to the eluted SPINT2 protein to a final concentration of 20% and  
310 protein aliquots were stored at -80°C. Protein concentration was determined by analyzing different  
311 dilutions of SPINT2 on an SDS-PAGE gel along with 5 defined concentrations of BSA between 100 ng and

312 1 µg. The gel was then stained with Coomassie, scanned with ChemiDoc Imaging system (Bio-Rad) and  
313 bands were quantified using Image Lab software (Bio-Rad). Concentrations of the SPINT2 dilutions were  
314 determined based on the BSA concentrations and the final SPINT2 concentration was calculated based on  
315 the average of the SPINT2 different dilutions.

### 316 **Peptide Assays**

317 Peptide assays were carried out as described (29). The sequence of the HMPV F peptide mimicking the  
318 HMPV F cleavage site used in this assay is ENPRQSRFVL including the same N- and C-terminal modifications  
319 as described for the HA peptides (29). The  $V_{max}$  was calculated by graphing each replicate in Microsoft  
320 Excel and determining the slope of the reaction for every concentration (0 nM, 1 nM, 5 nM, 10 nM, 25  
321 nM, 50 nM, 75 nM, 150 nM, 300 nM and 500 nM). The  $V_{max}$  values were then plotted in the GraphPad  
322 Prism 7 software against the log<sub>10</sub> of the SPINT2 concentration to produce a negative sigmoidal graph  
323 from which the IC<sub>50</sub>, or the concentration of SPINT2 at which the  $V_{max}$  is inhibited by half, could be  
324 extrapolated for each peptide protease mixture. Since the x-axis was the log<sub>10</sub> of the SPINT2  
325 concentration, the inverse log was then taken for each number to calculate the IC<sub>50</sub> in nM.

### 326 **Cytotoxicity assay**

327 The cytotoxicity assay was performed with a cell counting kit-8 (Dojindo Molecular Technologies)  
328 according to the manufacturer's instructions. In brief, approx.  $2 \times 10^3$  293T cells were seeded per well of  
329 a 96-well plate and grown over night. SPINT2 was added at the indicated concentrations. DMEM and 500  
330 µM H<sub>2</sub>O<sub>2</sub> were used as a control. 24 hours later 10 µl CCK-8 solution were added to each well and  
331 incubated for 1 hour. Absorbance at 450 nm was measured using a SPARK microplate reader (Tecan). Per  
332 sample and treatment three technical replicates were used and the average was counted as one biological  
333 replicate. Experiment was conducted three times.

### 334 **Metabolic protein labeling and immunoprecipitation of HMPV fusion protein**

335 VERO cells were transfected with 2ug of pDNA using Lipofectamine and plus reagent (Invitrogen) in opti-  
336 mem (Gibco) according to the manufacturers protocol. The following day, cells were washed with PBS and  
337 starved in cysteine/methionine deficient media for 45 min and radiolabeled with 50uCi/mL S35-  
338 cysteine/methionine for 4 hours. Cells were lysed in RIPA lysis buffer and processed as described  
339 previously (19) and the fusion protein of HMPV was immunoprecipitated using anti-HMPV F 54G10  
340 monoclonal antibody (John Williams, U. Pitt). Samples were run on a 15% SDS-PAGE and visualized using  
341 the typhoon imaging system. Band densitometry was conducted using ImageQuant software (GE).

#### 342 **SPINT2 cleavage inhibition by Western blot and cell-cell fusion assay**

343 Experiments were performed as previously described with minor modifications (23). Treatment with  
344 trypsin, recombinant matriptase and KLK5 were conducted as described (16, 44). For western blot analysis  
345 293T cells were transfected with Turbofect (Invitrogen) according to manufacturer's instructions. Cell-cell  
346 fusion assays were conducted with Vero cells that were transfected with Lipofectamine according to the  
347 manufacturer's instructions. Antibodies to detect A/Ca/04/09 (H1N1) HA (NR28666), A/Aichi/2/68 (H3N2)  
348 HA (NR3118) and A/Shanghai/2/2013 (H7N9) HA (NR48765) were obtained from the Biodefense and  
349 Emerging Infections Research Resources Repository. Respective secondary antibodies had an Alexa488  
350 tag (Invitrogen). Western blot membranes were scanned using a ChemiDoc imaging system (Bio-Rad). For  
351 quantification the pixel intensity of the individual HA<sub>1</sub> bands was measured using ImageJ software and  
352 cleavage efficiencies were calculated by the following equation: HA<sub>1</sub> 10 nM or 500 nM SPINT2/HA<sub>1</sub> 0nM  
353 SPINT2 x 100%. Cell-cell fusion assays were carried out as described (16).

#### 354 **Inhibition of viral infection in cell culture**

355 MDCK cells were seeded to a confluency of about 70% in 6-well plates. One plate each was then  
356 transformed with a plasmid allowing for the expression of human matriptase or human TMPRSS2. One  
357 plate was transformed with empty vector. 18 hours post transfection cells were infected with the  
358 respective egg-grown virus at a MOI of approx. 0.1. Different SPINT2 concentrations were added as

359 indicated. 0.8 nM trypsin was added to the cells transformed with the empty vector. 48 hours post  
360 infection supernatants were collected, centrifuged and stored at -80°C. Viral titers were determined using  
361 an immune-plaque assay as described (45).

## 362 **Acknowledgements**

363 J.T.K. and R.E.D. thank Dr. John Williams from U.Pitt Children's Hospital for kindly providing the 54G10  
364 anti-HMPV F antibody. This work was funded by National Institutes of Health grant 5R21AI117300.

## 365 **References**

- 366 1. World Health Organization. 2001. Global Epidemiological Surveillance Standards for Influenza 43.
- 367 2. Fouchier RAM, Guan Y. 2013. Ecology and evolution of influenza viruses in wild and domestic  
368 birds. *Textb Infla* 173–189.
- 369 3. Yen H, Webster RG. 2009. Pandemic Influenza as a Current Threat, p. 3–24. *In Current Topics in*  
370 *Microbiology and Immunology*.
- 371 4. The World Health Organization. 2017. WHO | Human infection with avian influenza A(H7N9)  
372 virus – China. WHO.
- 373 5. WHO. 2018. Influenza fact sheet. World Heal Organ.
- 374 6. Kilbourne ED. 2006. Influenza pandemics of the 20th century. *Emerg Infect Dis* 12:9–14.
- 375 7. Hussain M, Galvin HD, Haw TY, Nutsford AN, Husain M. 2017. Drug resistance in influenza a virus:  
376 The epidemiology and management. *Infect Drug Resist* 10:121–134.
- 377 8. Taylor S, Lopez P, Weckx L, Borja-Tabora C, Ulloa-Gutierrez R, Lazcano-Ponce E, Kerdpanich A,  
378 Angel Rodriguez Weber M, Mascareñas de Los Santos A, Tinoco J-C, Safadi MAP, Lim FS,  
379 Hernandez-de Mezerville M, Faingezicht I, Cruz-Valdez A, Feng Y, Li P, Durviaux S, Haars G, Roy-  
380 Ghanta S, Vaughn DW, Nolan T. 2017. Respiratory viruses and influenza-like illness: Epidemiology  
381 and outcomes in children aged 6 months to 10 years in a multi-country population sample. *J*  
382 *Infect* 74:29–41.



- 383 9. Li Y, Reeves RM, Wang X, Bassat Q, Brooks WA, Cohen C, Moore DP, Nunes M, Rath B, Campbell  
384 H, Nair H, Acacio S, Alonso WJ, Antonio M, Ayora Talavera G, Badarch D, Baillie VL, Barrera-  
385 Badillo G, Bigogo G, Broor S, Bruden D, Buchy P, Byass P, Chipeta J, Clara W, Dang D-A, de Freitas  
386 Lázaro Emediato CC, de Jong M, Díaz-Quiñonez JA, Do LAH, Fasce RA, Feng L, Ferson MJ, Gentile  
387 A, Gessner BD, Goswami D, Goyet S, Grijalva CG, Halasa N, Hellferscee O, Hessong D, Homaira N,  
388 Jara J, Kahn K, Khuri-Bulos N, Kotloff KL, Lanata CF, Lopez O, Lopez Bolaños MR, Lucero MG,  
389 Lucion F, Lupisan SP, Madhi SA, Mekgoe O, Moraleda C, Moyes J, Mulholland K, Munywoki PK,  
390 Naby F, Nguyen TH, Nicol MP, Nokes DJ, Noyola DE, Onozuka D, Palani N, Poovorawan Y, Rahman  
391 M, Ramaekers K, Romero C, Schlaudecker EP, Schweiger B, Seidenberg P, Simoes EAF, Singleton  
392 R, Sistla S, Sturm-Ramirez K, Suntronwong N, Sutanto A, Tapia MD, Thamthitawat S, Thongpan I,  
393 Tillekeratne G, Tinoco YO, Treurnicht FK, Turner C, Turner P, van Doorn R, Van Ranst M, Visseaux  
394 B, Waicharoen S, Wang J, Yoshida L-M, Zar HJ. 2019. Global patterns in monthly activity of  
395 influenza virus, respiratory syncytial virus, parainfluenza virus, and metapneumovirus: a  
396 systematic analysis. *Lancet Glob Heal* 7:e1031–e1045.
- 397 10. Kahn JS. 2006. Epidemiology of Human Metapneumovirus. *Clin Microbiol Rev* 19:546–557.
- 398 11. van den Hoogen BG, de Jong JC, Groen J, Kuiken T, de Groot R, Fouchier RAM, Osterhaus ADME.  
399 2001. A newly discovered human pneumovirus isolated from young children with respiratory  
400 tract disease. *Nat Med* 7:719–724.
- 401 12. Leung J, Esper F, Weibel C, Kahn JS. 2005. Seroepidemiology of Human Metapneumovirus (hMPV)  
402 on the Basis of a Novel Enzyme-Linked Immunosorbent Assay Utilizing hMPV Fusion Protein  
403 Expressed in Recombinant Vesicular Stomatitis Virus. *J Clin Microbiol* 43:1213–1219.
- 404 13. Steinhauer D. 1999. Role of hemagglutinin cleavage for the pathogenicity of influenza virus.  
405 *Virology* 258:1–20.
- 406 14. Taubenberger JK. 1998. Influenza virus hemagglutinin cleavage into HA1, HA2: no laughing

- 407 matter. Proc Natl Acad Sci U S A 95:9713–9715.
- 408 15. Böttcher-Friebertshäuser E, Klenk HD, Garten W. 2013. Activation of influenza viruses by  
409 proteases from host cells and bacteria in the human airway epithelium. Pathog Dis 69:87–100.
- 410 16. Hamilton BS, Whittaker GR. 2013. Cleavage activation of human-adapted influenza virus subtypes  
411 by kallikrein-related peptidases 5 and 12. J Biol Chem 288:17399–17407.
- 412 17. Horimoto T, Nakayama K, Smeekens SP, Kawaoka Y. 1994. Proprotein-processing endoproteases  
413 PC6 and furin both activate hemagglutinin of virulent avian influenza viruses. J Virol 68:6074–  
414 6078.
- 415 18. Shirogane Y, Takeda M, Iwasaki M, Ishiguro N, Takeuchi H, Nakatsu Y, Tahara M, Kikuta H, Yanagi  
416 Y. 2008. Efficient Multiplication of Human Metapneumovirus in Vero Cells Expressing the  
417 Transmembrane Serine Protease TMPRSS2. J Virol 82:8942–8946.
- 418 19. Schowalter RM, Smith SE, Dutch RE. 2006. Characterization of Human Metapneumovirus F  
419 Protein-Promoted Membrane Fusion: Critical Roles for Proteolytic Processing and Low pH. J Virol  
420 80:10931–10941.
- 421 20. Millet JK, Whittaker GR. 2014. Host cell proteases: Critical determinants of coronavirus tropism  
422 and pathogenesis. Virus Res.
- 423 21. Laporte M, Naesens L. 2017. Airway proteases: an emerging drug target for influenza and other  
424 respiratory virus infections. Curr Opin Virol 24:16–24.
- 425 22. Zhirnov OP, Matrosovich TY, Matrosovich MN, Klenk H. 2011. Short communication Aprotinin , a  
426 protease inhibitor , suppresses proteolytic activation of pandemic H1N1v influenza virus  
427 174:169–174.
- 428 23. Hamilton BS, Chung C, Cyphers SY, Rinaldi VD, Marcano VC, Whittaker GR. 2014. Inhibition of  
429 influenza virus infection and hemagglutinin cleavage by the protease inhibitor HAI-2. Biochem  
430 Biophys Res Commun 450:1070–1075.

- 431 24. Szabo R, Hobson JP, List K, Molinolo A, Lin C-Y, Bugge TH. 2008. Potent inhibition and global co-  
432 localization implicate the transmembrane Kunitz-type serine protease inhibitor hepatocyte  
433 growth factor activator inhibitor-2 in the regulation of epithelial matriptase activity. *J Biol Chem*  
434 283:29495–504.
- 435 25. Wu SR, Teng CH, Tu YT, Ko CJ, Cheng TS, Lan SW, Lin HY, Lin HH, Tu HF, Hsiao PW, Huang HP,  
436 Chen CH, Lee MS. 2017. The Kunitz Domain i of Hepatocyte Growth Factor Activator Inhibitor-2  
437 Inhibits Matriptase Activity and Invasive Ability of Human Prostate Cancer Cells. *Sci Rep* 7:1–19.
- 438 26. Wu SR, Lin CH, Shih HP, Ko CJ, Lin HY, Lan SW, Lin HH, Tu HF, Ho CC, Huang HP, Lee MS. 2019.  
439 HAI-2 as a novel inhibitor of plasmin represses lung cancer cell invasion and metastasis. *Br J*  
440 *Cancer* 120:499–511.
- 441 27. Roversi FM, Olalla Saad ST, Machado-Neto JA. 2018. Serine peptidase inhibitor Kunitz type 2  
442 (SPINT2) in cancer development and progression. *Biomed Pharmacother* 101:278–286.
- 443 28. Jaimes JA, Millet JK, Goldstein ME, Whittaker GR, Straus MR. 2019. A Fluorogenic Peptide  
444 Cleavage Assay to Screen for Proteolytic Activity: Applications for coronavirus spike protein  
445 activation. *J Vis Exp*.
- 446 29. Straus MR, Whittaker GR. 2017. A peptide-based approach to evaluate the adaptability of  
447 influenza A virus to humans based on its hemagglutinin proteolytic cleavage site. *PLoS One*  
448 12:e0174827.
- 449 30. Biacchesi S, Pham QN, Skiadopoulos MH, Murphy BR, Collins PL, Buchholz UJ. 2006. Modification  
450 of the trypsin-dependent cleavage activation site of the human metapneumovirus fusion protein  
451 to be trypsin independent does not increase replication or spread in rodents or nonhuman  
452 primates. *J Virol* 80:5798–806.
- 453 31. Galloway SE, Reed ML, Russell CJ, Steinhauer DA. 2013. Influenza HA Subtypes Demonstrate  
454 Divergent Phenotypes for Cleavage Activation and pH of Fusion: Implications for Host Range and

- 455           Adaptation. PLoS Pathog 9:e1003151.
- 456   32.   Hatesuer B, Bertram S, Mehnert N, Bahgat MM, Nelson PS, Pöhlman S, Schughart K. 2013.
- 457           Tmprss2 Is Essential for Influenza H1N1 Virus Pathogenesis in Mice. PLoS Pathog 9:1–10.
- 458   33.   Sakai K, Ami Y, Tahara M, Kubota T, Anraku M, Abe M, Nakajima N, Sekizuka T, Shirato K, Suzuki
- 459           Y, Aina A, Nakatsu Y, Kanou K, Nakamura K, Suzuki T, Komase K, Nobusawa E, Maenaka K, Kuroda
- 460           M, Hasegawa H, Kawaoka Y, Tashiro M, Takeda M. 2014. The host protease TMPRSS2 plays a
- 461           major role in in vivo replication of emerging H7N9 and seasonal influenza viruses. J Virol
- 462           88:5608–16.
- 463   34.   Baron J, Tarnow C, Mayoli-Nüssle D, Schilling E, Meyer D, Hammami M, Schwalm F, Steinmetzer
- 464           T, Guan Y, Garten W, Klenk H-D, Böttcher-Friebertshäuser E. 2012. Matriptase, HAT, and
- 465           TMPRSS2 Activate the Hemagglutinin of H9N2 Influenza A Viruses. J Virol 87:1811–1820.
- 466   35.   Kühn N, Bergmann S, Kösterke N, Lambertz RLO, Keppner A, van den Brand JMA, Pöhlmann S,
- 467           Weiß S, Hummler E, Hatesuer B, Schughart K. 2016. The Proteolytic Activation of (H3N2)
- 468           Influenza A Virus Hemagglutinin Is Facilitated by Different Type II Transmembrane Serine
- 469           Proteases. J Virol 90:4298–4307.
- 470   36.   Houser K, Subbarao K. 2015. Influenza vaccines: challenges and solutions. Cell Host Microbe
- 471           17:295–300.
- 472   37.   Karlsson EA, Meliopoulos VA, van de Velde NC, van de Velde L-A, Mann B, Gao G, Rosch J,
- 473           Tuomanen E, McCullers J, Vogel P, Schultz-Cherry S. 2017. A Perfect Storm: Increased
- 474           Colonization and Failure of Vaccination Leads to Severe Secondary Bacterial Infection in Influenza
- 475           Virus-Infected Obese Mice. MBio 8.
- 476   38.   Sielaff F, Böttcher-Friebertshäuser E, Meyer D, Saupe SM, Volk IM, Garten W, Steinmetzer T.
- 477           2011. Development of substrate analogue inhibitors for the human airway trypsin-like protease
- 478           HAT. Bioorganic Med Chem Lett 21:4860–4864.

- 479 39. Meyer D, Sielaff F, Hammami M, Böttcher-Friebertshäuser E, Garten W, Steinmetzer T. 2013.  
480 Identification of the first synthetic inhibitors of the type II transmembrane serine protease  
481 TMPRSS2 suitable for inhibition of influenza virus activation. *Biochem J* 452:331–343.
- 482 40. Yamaya M, Shimotai Y, Hatachi Y, Lusamba Kalonji N, Tando Y, Kitajima Y, Matsuo K, Kubo H,  
483 Nagatomi R, Hongo S, Homma M, Nishimura H. 2015. The serine protease inhibitor camostat  
484 inhibits influenza virus replication and cytokine production in primary cultures of human tracheal  
485 epithelial cells. *Pulm Pharmacol Ther* 33:66–74.
- 486 41. Matsuyama S, Nagata N, Shirato K, Kawase M, Takeda M, Taguchi F. 2010. Efficient Activation of  
487 the Severe Acute Respiratory Syndrome Coronavirus Spike Protein by the Transmembrane  
488 Protease TMPRSS2. *J Virol* 84:12658–12664.
- 489 42. Gierer S, Bertram S, Kaup F, Wrensch F, Heurich A, Kramer-Kuhl A, Welsch K, Winkler M, Meyer B,  
490 Drosten C, Dittmer U, von Hahn T, Simmons G, Hofmann H, Pohlmann S. 2013. The Spike Protein  
491 of the Emerging Betacoronavirus EMC Uses a Novel Coronavirus Receptor for Entry, Can Be  
492 Activated by TMPRSS2, and Is Targeted by Neutralizing Antibodies. *J Virol* 87:5502–5511.
- 493 43. Kinder JT, Klimyte EM, Chang A, Williams J V, Dutch RE. 2019. Human metapneumovirus fusion  
494 protein triggering: Increasing complexities by analysis of new HMPV fusion proteins. *Virology*  
495 531:248–254.
- 496 44. Hamilton BS, Gludish DWJ, Whittaker GR. 2012. Cleavage Activation of the Human-Adapted  
497 Influenza Virus Subtypes by Matriptase Reveals both Subtype and Strain Specificities. *J Virol*  
498 86:10579–10586.
- 499 45. Tse L V, Marcano VC, Huang W, Pocwierz MS, Whittaker GR. 2013. Plasmin-mediated activation  
500 of pandemic H1N1 influenza virus hemagglutinin is independent of the viral neuraminidase. *J*  
501 *Virol* 87:5161–9.
- 502

503 **Figure Legends**

504 **Figure 1: Cleavage profile of the HMPV F:** A fluorogenic peptide mimicking the cleavage site of HMPV F  
505 was incubated with the indicated proteases and cleavage was monitored by the increase of fluorescence  
506 at 390 nm.

507 **Figure 2: Cytotoxicity assay to evaluate the cytotoxic effect of SPINT2.**

508 293T cells were incubated with indicated SPINT2 concentrations for 24 hours. DMEM and 500  $\mu$ M H<sub>2</sub>O<sub>2</sub>  
509 served as controls. After 24 hours cell viability was determined via a spectrophotometric assay.

510 **Figure 3: SPINT2 inhibits cleavage of HA protein expressed in 293T cells.** Cells were transfected with  
511 plasmids encoding for the indicated HA and allowed to express the protein for ~18 hours. The recombinant  
512 proteases were incubated for 15 minutes with the indicated SPINT2 concentrations and subsequently  
513 added to the cells for 10 minutes (trypsin) or 90 minutes (matriptase and KLK5). Western blots were  
514 performed and the HA<sub>1</sub> band was quantified using ImageJ. (A) Quantification of the HA1 band comparing  
515 the signal intensity of the 0 nM SPINT2 samples against 10 nM and 500 nM SPINT2 of the respective  
516 HA/protease combination. (B – D) Western blots showing the cleavage of (B) A/Ca/04/09 H1N1 HA by  
517 matriptase and KLK5 at different SPINT2 concentration, (C) A/Aichi/2/68 H3N2 HA by KLK5 at different  
518 SPINT2 concentration and (D) A/Shanghai/2/2013 H7N9 HA by matriptase and KLK5 at different SPINT2  
519 concentrations.

520 **Figure 4: TMPRSS2, HAT, matriptase and KLK5 cleave HMPV F and SPINT2 is able to prevent cleavage by**  
521 **exogenous proteases.** HMPV F was either expressed alone or co-transfected with protease and allowed  
522 to express for ~ 18hours. Cells were then metabolically starved of cysteine and methionine followed by  
523 radioactive S35 labeling of protein for 4 hours in the presence of TPCK-trypsin or specified protease.  
524 SPINT2 treated proteases were incubated at room temperature for 10 minutes and placed onto cells for  
525 4 hours. Radioactive gels were quantified using ImageQuant software with percent cleavage equal  
526 to  $\left[\left(\frac{F_1}{F_0+F_1}\right) \times 100\right]$ . A and B) Co-transfected proteases TMPRSS2, HAT and matriptase are able to cleave

527 HMPV F while C and D) exogenous proteases KLK5 and matriptase but not KLK12 are able to cleave HMPV  
528 F. E and F) SPINT2 prevented cleavage of HMPV F by trypsin, KLK5 and matriptase at nm concentrations  
529 demonstrated by the loss of the F<sub>1</sub> cleavage product.

530 **Figure 5: SPINT2 inhibits HA-mediated cell-cell fusion.** VERO cells were transfected with plasmids  
531 encoding for (A) A/Ca/04/09 H1N1 HA or (B) A/Shanghai/2/2013 H7N9 HA and allowed to express the  
532 protein for ~18 hours. Recombinant matriptase and KLK5 were incubated with different SPINT2  
533 concentrations for 15 minutes and then added to the HA-expressing cells for 3 hours. After 3 hours the  
534 cells were briefly treated with cell fusion buffer at pH5, washed, supplemented with growth medium and  
535 returned to the incubator for 1 hour to allow fusion. HA protein was detected using a fluorogenic Alexa488  
536 antibody. Nuclei were stained using DAPI.

537 **Figure 6: SPINT2 reduces viral growth in cell culture.** MDCK cells were transfected with plasmids encoding  
538 for human matriptase or human TMPRSS2 and allowed to express the proteins for ~18 hours. Cells  
539 expressing human matriptase (B) or human TMPRSS2 (C) were then infected with A/Ca/04/09 H1N1 at a  
540 MOI of 0.1 and different SPINT2 concentration were added to each well. Non-transfected cells to which  
541 trypsin was added served as a control (A). (D) MDCK cells were infected with A/X31 H3N2 at an MOI of  
542 0.1 and trypsin was added to assist viral propagation. Different SPINT2 concentration were added as  
543 indicated. After 48 hours of infection the supernatants were collected and used for an immuno-plaque  
544 assay to determine the viral loads. Experiment was repeated three times and each dot represents the viral  
545 titer of a single experiment. \* indicates if  $p < 0.05$  compared to the sample with 0 nM SPINT2.

546 **Figure 7: SPINT2 reduces viral growth when added 24 hours post infection.** MDCK cells were infected  
547 with A/Ca/04/09 H1N1 at a MOI of 0.1 and trypsin was added. 500nM SPINT2 were added at the time of  
548 infection or 24 hours post infection. Supernatants were collected 48 hours post infection and used for an  
549 immuno-plaque assay to determine the viral titers.

550 **Supplemental Figure 1:** Fluorogenic peptides mimicking the cleavage sites (A) A/Ca/04/09 H1N1, (B)  
551 A/Japan/305/1957 H2N2 HA, (C) A/Aichi/2/68 H3N2 HA, (D) A/Vietnam/1203/2004 H5N1 LPAI HA, (E)  
552 A/Vietnam/1204/2004 H5N1 HPAI HA, (F) A/Taiwan/2/2013 H6N1 HA, (G) A/Shanghai/2/2013 H7N9 HA,  
553 (H) A/Hong Kong/2108/2003 H9N2 HA and (I) HMPV F were incubated with the indicated proteases and  
554 different SPINT2 concentrations. Cleavage was monitored by the increase of fluorescence at 390 nm and  
555 the resulting Vmax values were plotted against the different SPINT2 concentrations on a logarithmic scale  
556 (x-axis). Prism 7 software was then used to calculate the IC50 values based on the graphs shown in this  
557 figure as described in the “Material and Methods” section. In some cases the error bars are shorter than  
558 the height of the symbol and therefore are not displayed.

559 **Table 1: IC50 values of all protease/peptide combinations.** : Fluorogenic peptides mimicking the cleavage  
560 sites of A/Ca/04/09 H1N1, A/Japan/305/1957 H2N2 HA, A/Aichi/2/68 H3N2 HA, A/Vietnam/1203/2004  
561 H5N1 LPAI HA, A/Vietnam/1204/2004 H5N1 HPAI HA, A/Taiwan/2/2013 H6N1 HA, A/Shanghai/2/2013  
562 H7N9 HA, A/Hong Kong/2108/2003 H9N2 HA and HMPV F were incubated with the indicated proteases  
563 and different SPINT2 concentrations. Cleavage was monitored by the increase of fluorescence at 390 nm  
564 and the resulting Vmax values were used to calculate the IC50 values as described in the “Material and  
565 Methods” section. (A) IC50 values of influenza A fluorogenic cleavage site peptide mimics. Concentrations  
566 are in nanomolar. (B) IC50 values of the HMPV F cleavage site peptide mimic. Concentrations are in  
567 picomolar. NT = Not tested.

568 **Table 2: Viral titers measured in the infection studies:** Table shows the average viral titers and standard  
569 deviation calculated from the 3 independent biological replicates depicted in Figures 6 and 7. (A) Titers  
570 and standard deviation from infection studies shown in Figure 6. (B) Titers and standard deviation shown  
571 in Figure 7.

572



573 **Table 1**

574 **A**

|              | Trypsin | Matriptase | HAT   | KLK5  | KLK12 | Plasmin |
|--------------|---------|------------|-------|-------|-------|---------|
| H1N1 HA      | 70.57   | 25         | 24.08 | 28.34 | 11.7  | 122.1   |
| H2N2 HA      | 155.4   | NT         | 34.74 | 8.269 | 6.881 | NT      |
| H3N2 HA      | 207.9   | NT         | 15.33 | 9.537 | NT    | 106     |
| H5N1 HPAI HA | 1135    | 194.1      | NT    | NT    | NT    | 1166    |
| H5N1 LPAI HA | 145.8   | 5.316      | 23.56 | 6.375 | 3.656 | 160.1   |
| H6N1 HA      | 30.52   | NT         | NT    | 29.93 | 14.04 | NT      |
| H7N9 HA      | 20.97   | 7.999      | NT    | NT    | NT    | 77.59   |
| H9N2 HA      | 99.16   | 9.015      | 12.74 | 11.79 | NT    | 134     |

575

576 **B**

|        | Trypsin | Matriptase | HAT | KLK5 | KLK12 | Plasmin |
|--------|---------|------------|-----|------|-------|---------|
| HMPV F | 40      | 0.3        | NT  | 950  | NT    | NT      |

577

578 **Table 2**

579 **A**

| SPINT2<br>(nM) | Trypsin - H1N1 |          | Matriptase - H1N1 |          | TMPRSS2 - H1N1 |          | Trypsin - X31  |          |
|----------------|----------------|----------|-------------------|----------|----------------|----------|----------------|----------|
|                | Average pfu/ml | StDev    | Average pfu/ml    | StDev    | Average pfu/ml | StDev    | Average pfu/ml | StDev    |
| 0              | 1.99E+08       | 3.91E+07 | 9.47E+06          | 9.02E+05 | 1.95E+09       | 4.39E+08 | 4.90E+08       | 1.16E+08 |
| 10             | 1.14E+08       | 3.70E+07 | 7.80E+06          | 1.04E+06 | 1.73E+09       | 2.95E+08 | 2.93E+08       | 7.57E+06 |
| 50             | 5.93E+07       | 3.06E+06 | 4.27E+06          | 1.40E+06 | 9.24E+08       | 4.16E+08 | 2.08E+08       | 6.16E+07 |
| 150            | 4.60E+07       | 8.72E+06 | 3.27E+06          | 1.62E+06 | 5.09E+08       | 2.44E+08 | 7.80E+07       | 4.65E+07 |
| 500            | 1.40E+07       | 5.29E+06 | 8.00E+05          | 5.29E+05 | 9.53E+07       | 3.43E+07 | 1.40E+07       | 5.29E+06 |

580 **B**

| SPINT2<br>(nM) | Trypsin - H1N1 |          |
|----------------|----------------|----------|
|                | Average pfu/ml | StDev    |
| 0              | 1.88E+08       | 1.06E+07 |
| 500            | 2.80E+07       | 1.00E+07 |
| 500<br>24hpi   | 4.07E+07       | 2.00E+07 |

581

582 Figure 1

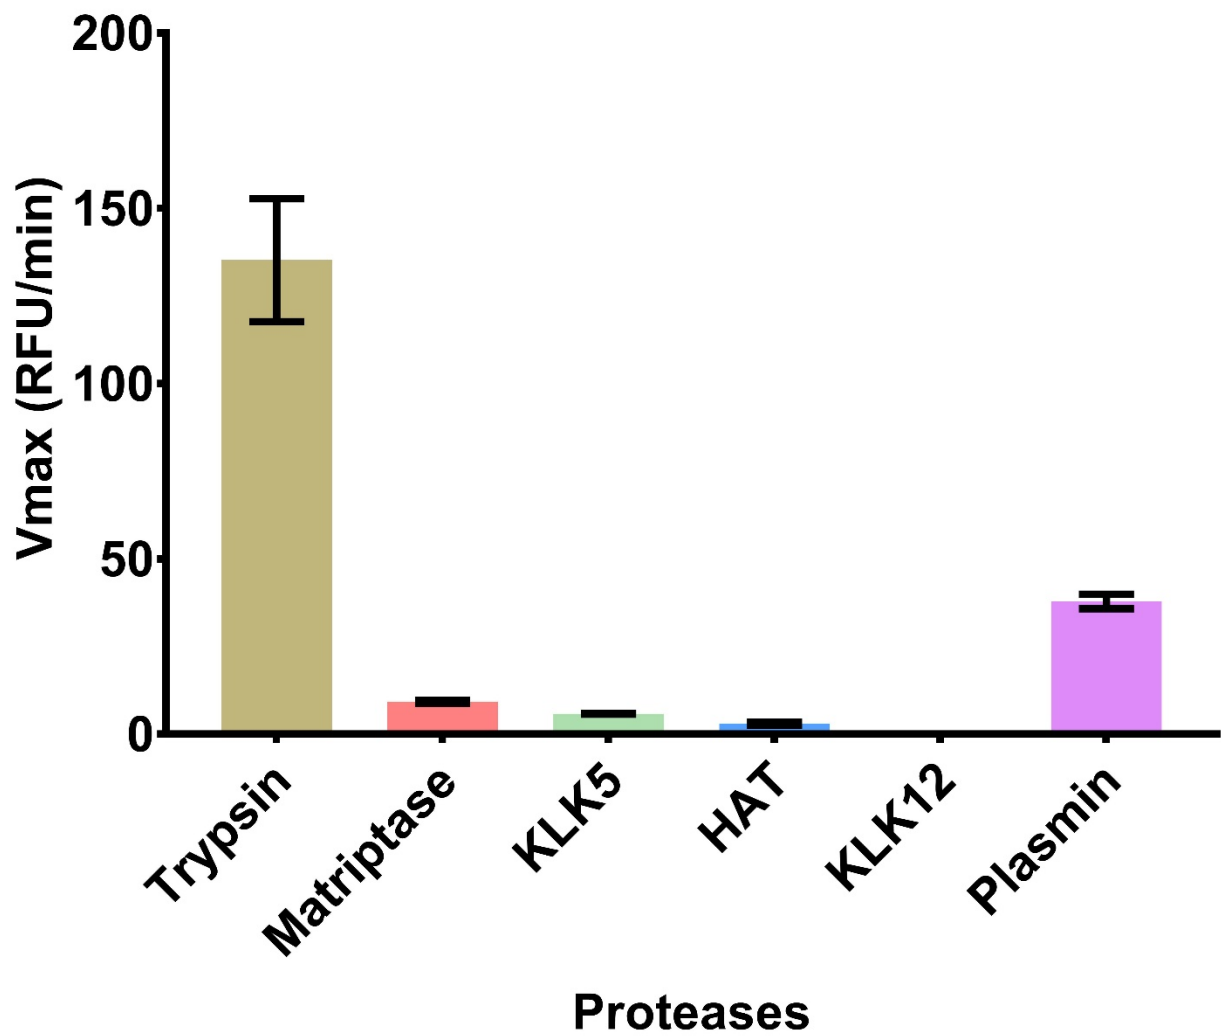

583

584 Figure 2

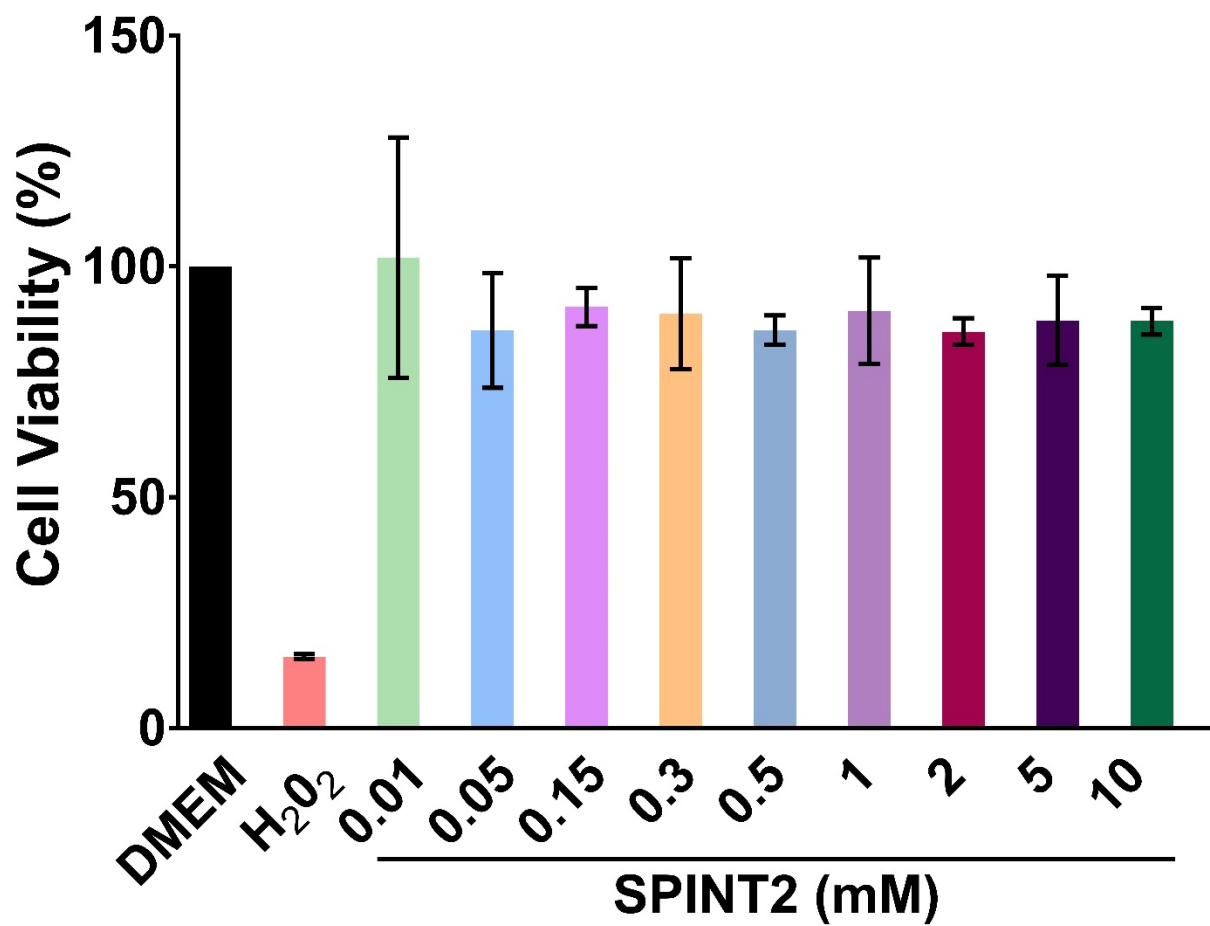

585

586

587 **Figure 3**

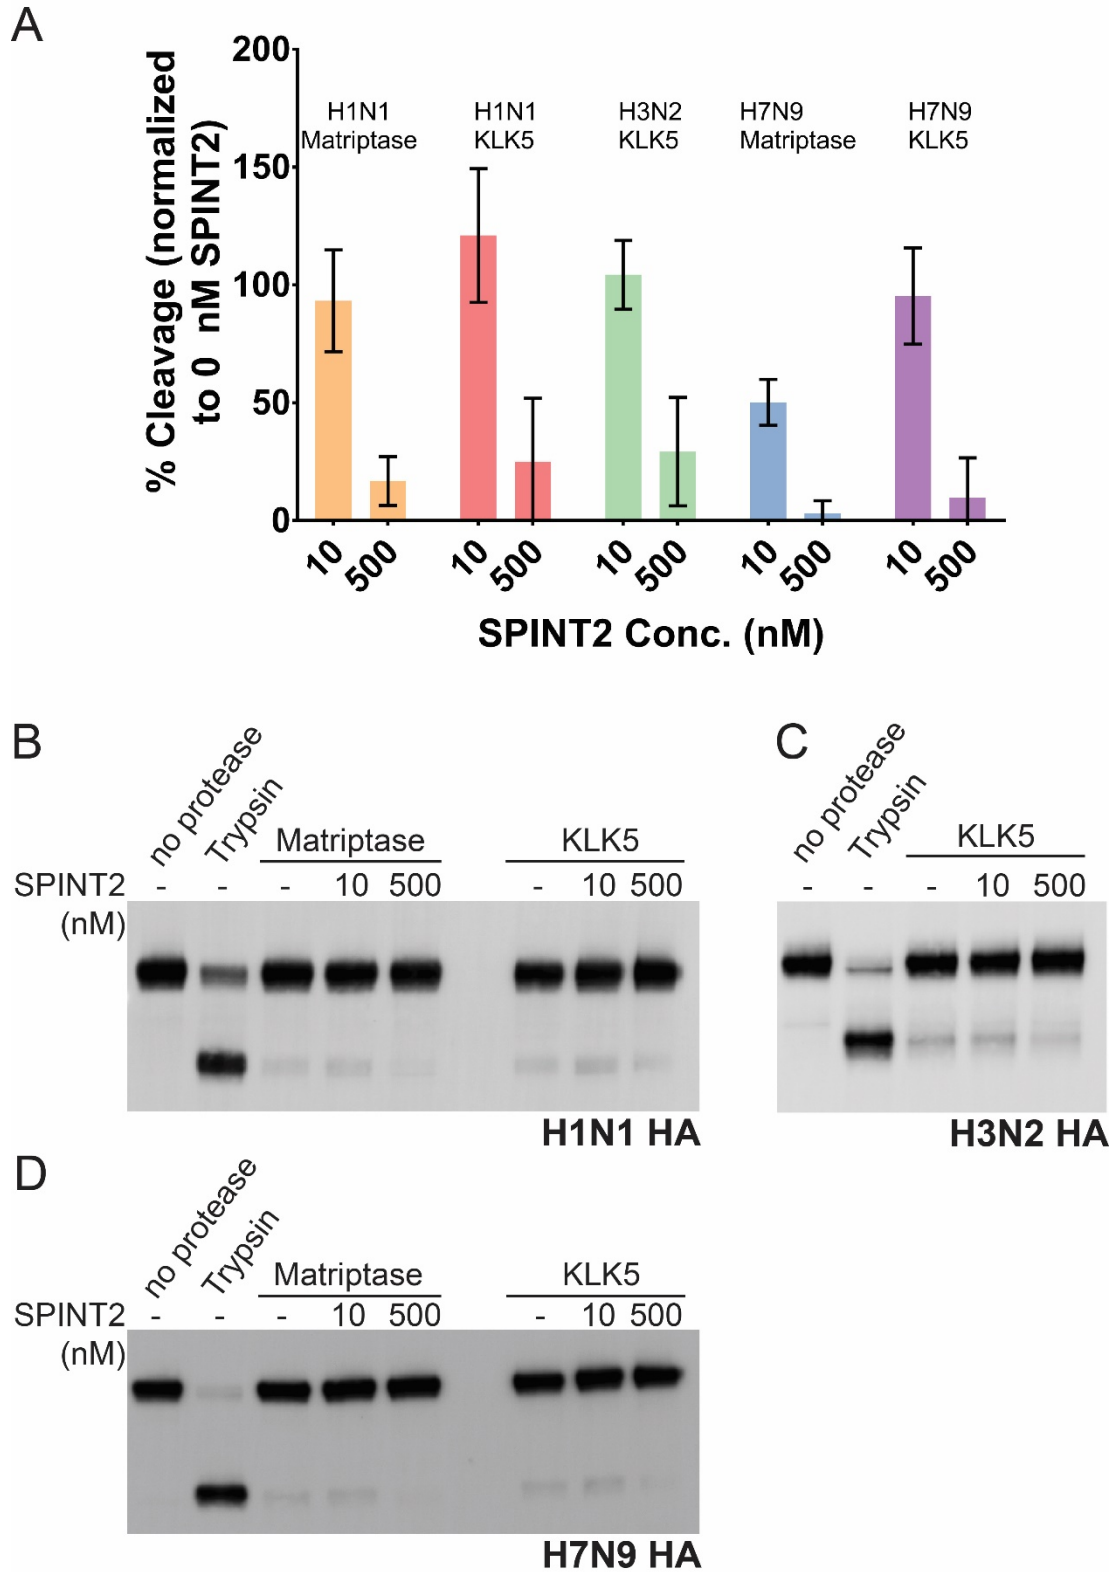

588

589

590 **Figure 4**

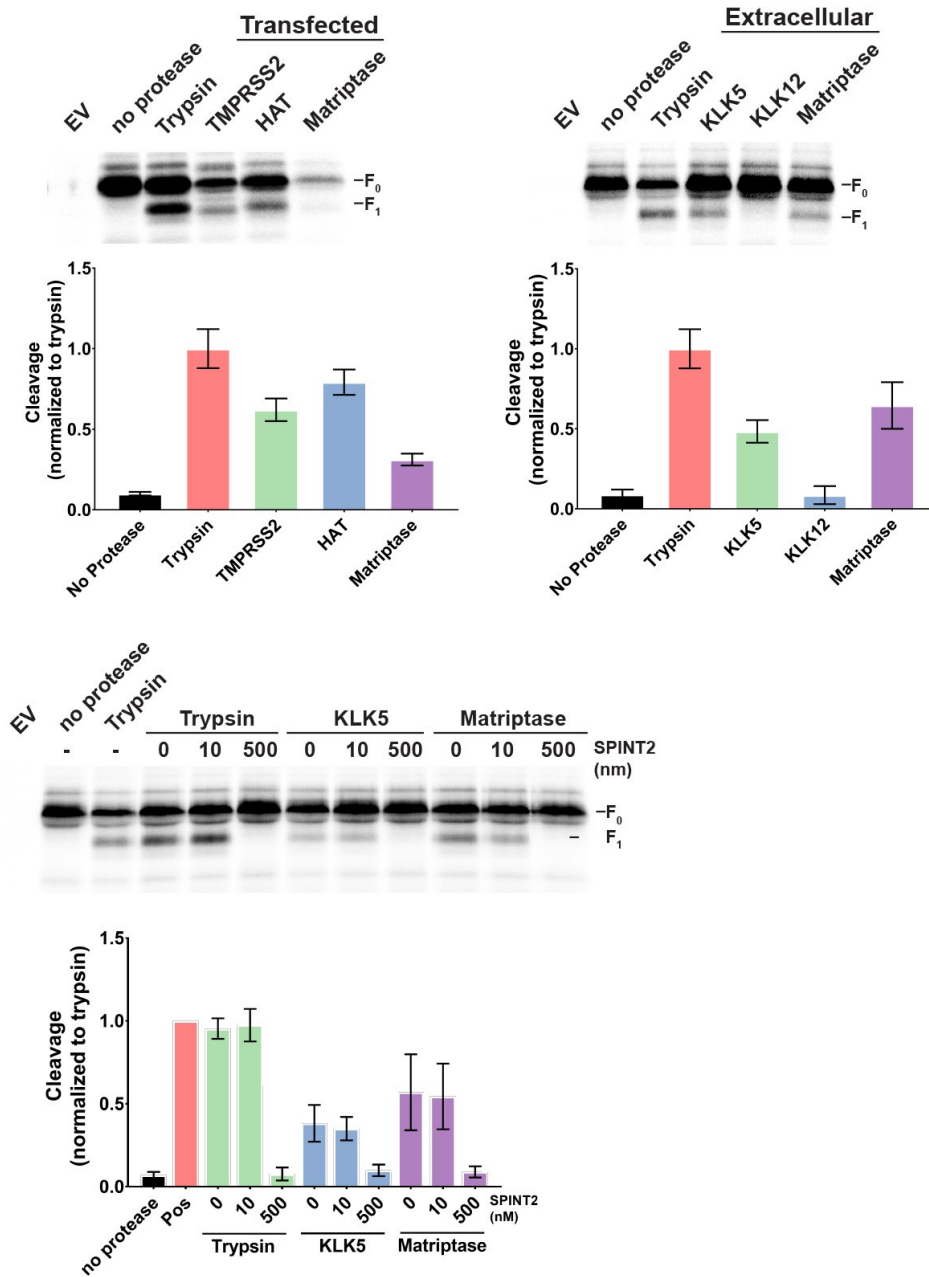

591

592

593 **Figure 5**

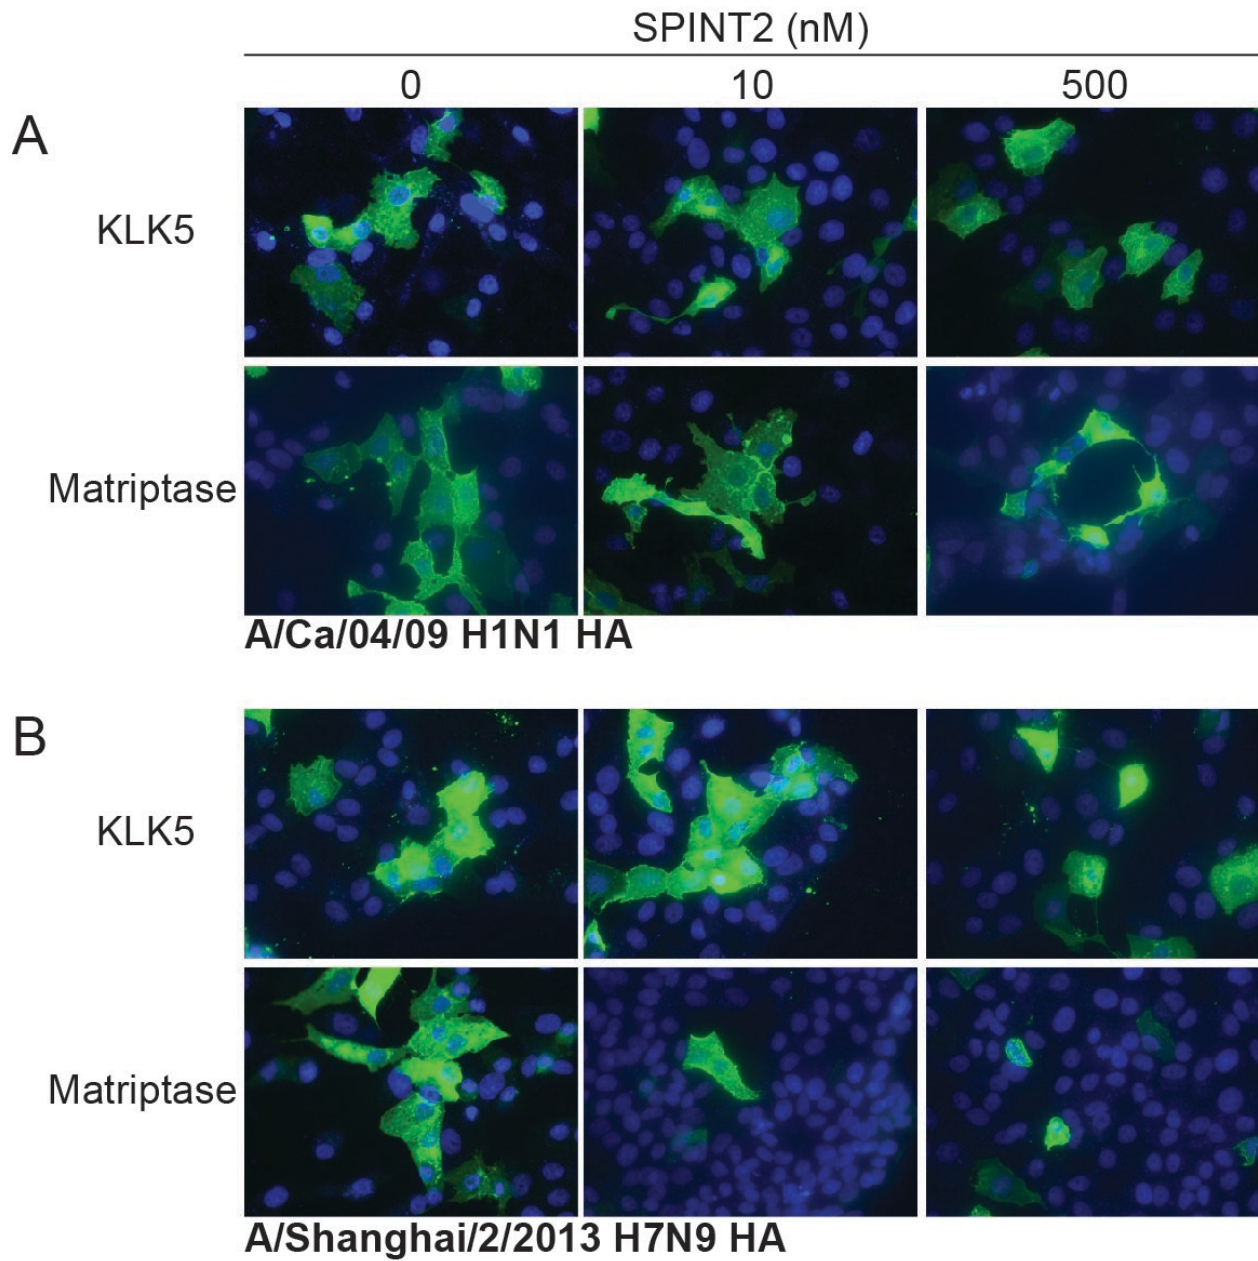

594

595

596 **Figure 6**

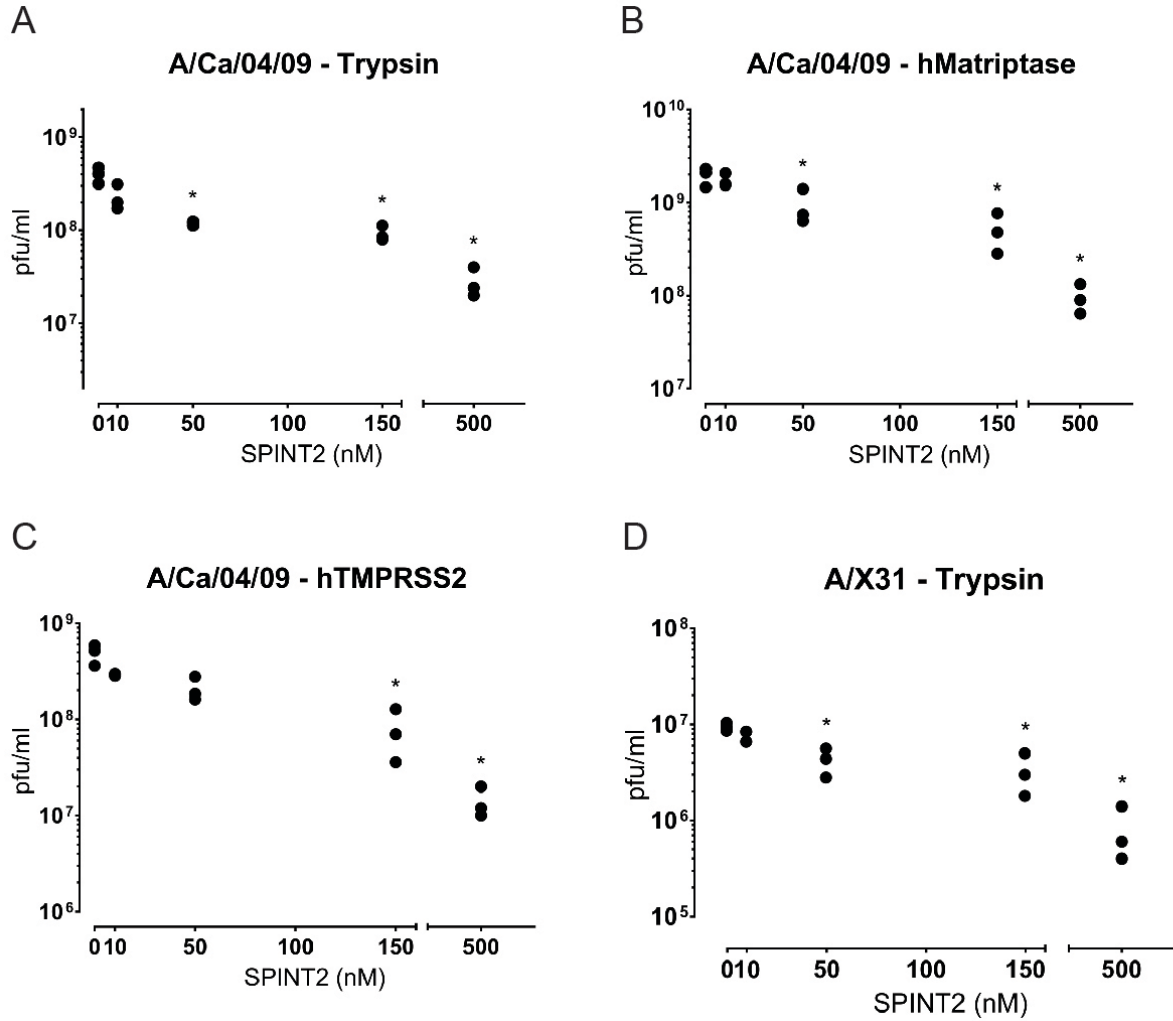

597

598

599 Figure 7

## Time Course A/Ca/04/09 - Trypsin

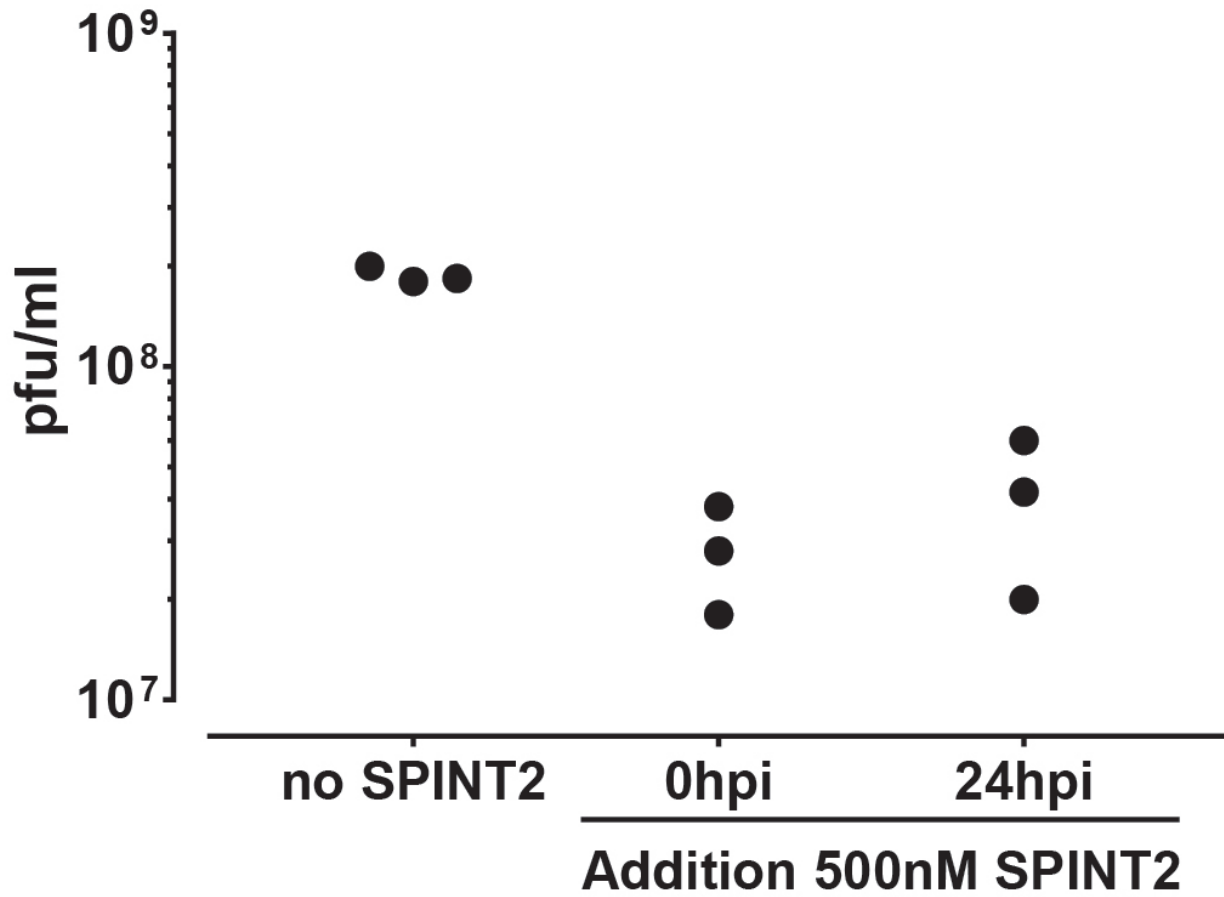

600

601



602 Supplemental Figure 1

A

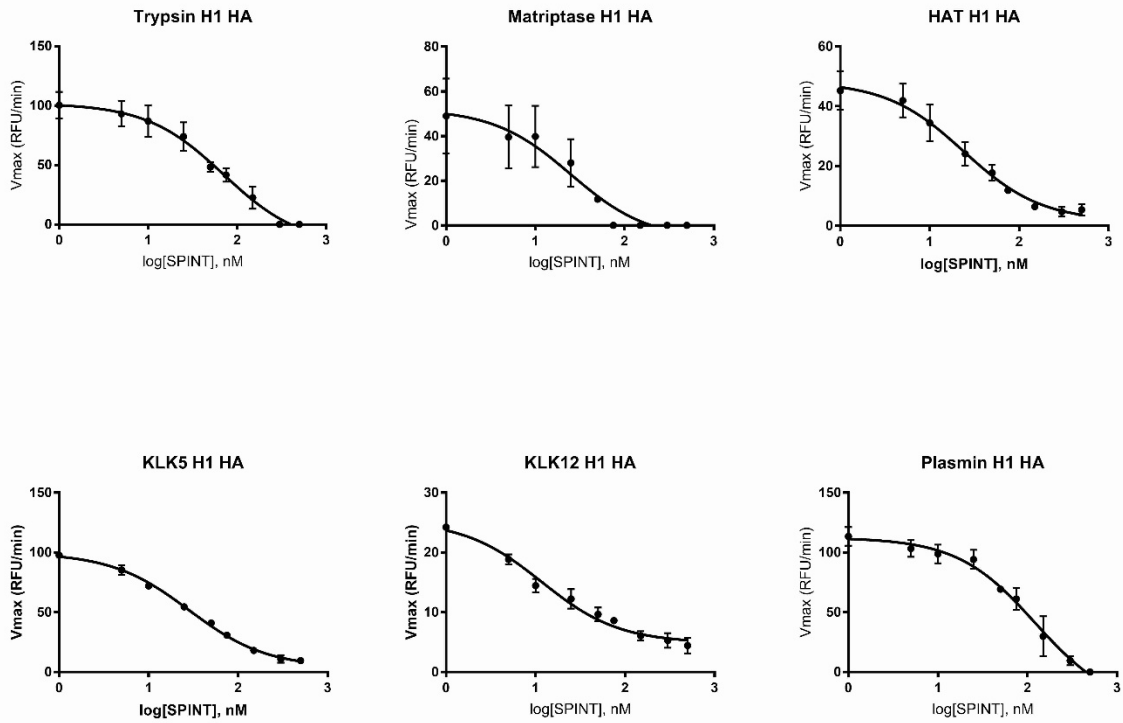

603

B

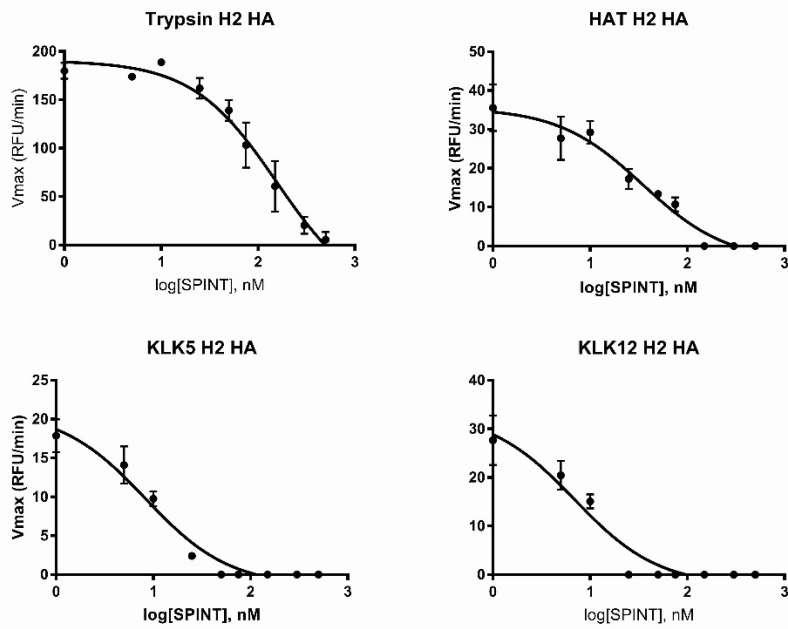

604

C

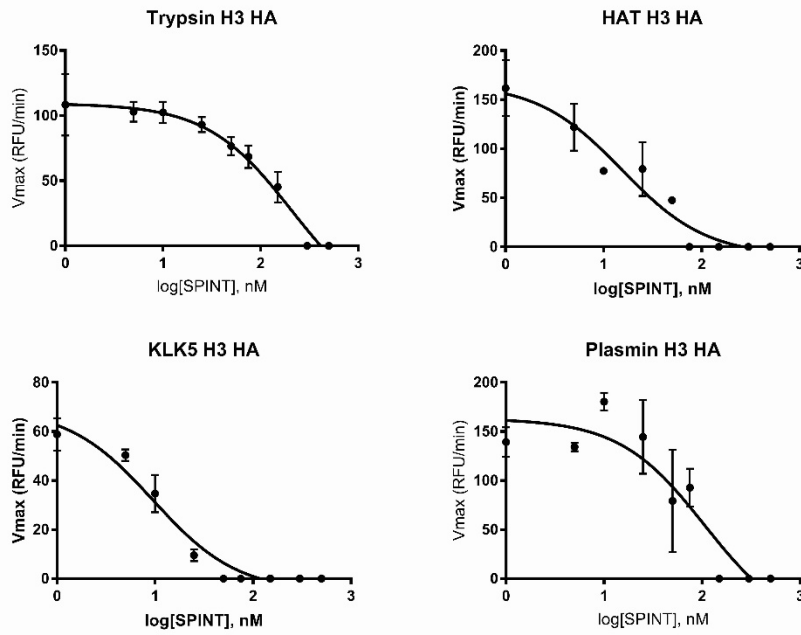

605

D

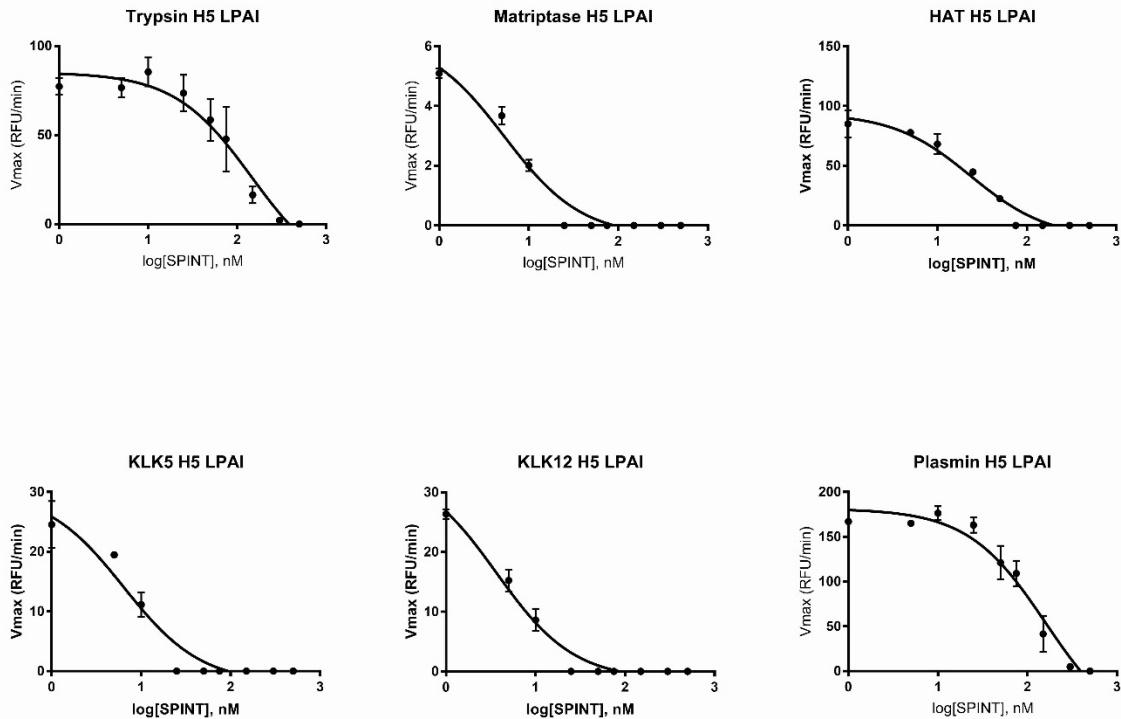

606

**E**

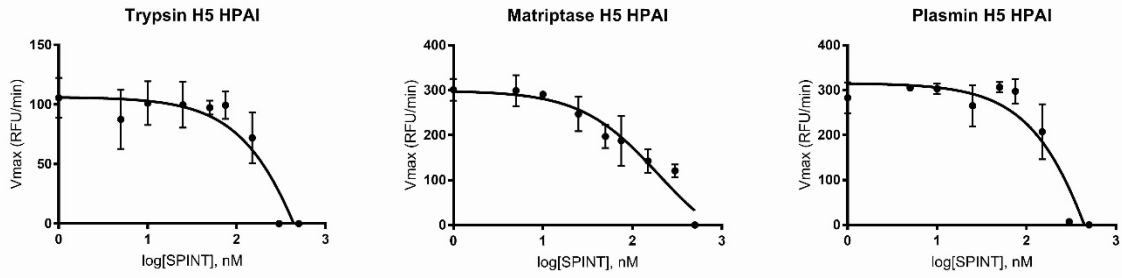

607

**F**

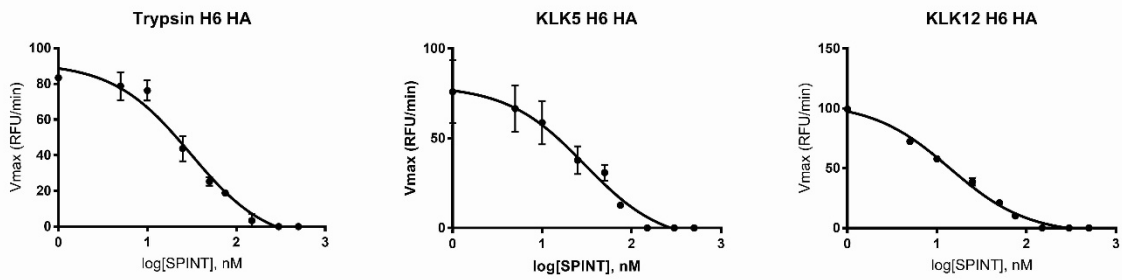

608

**G**

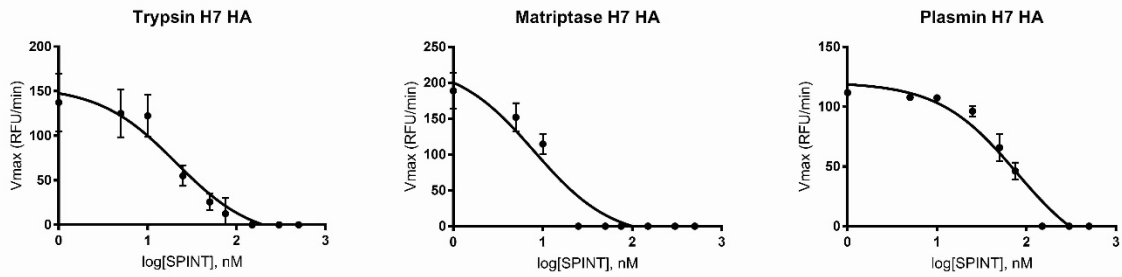

609

H

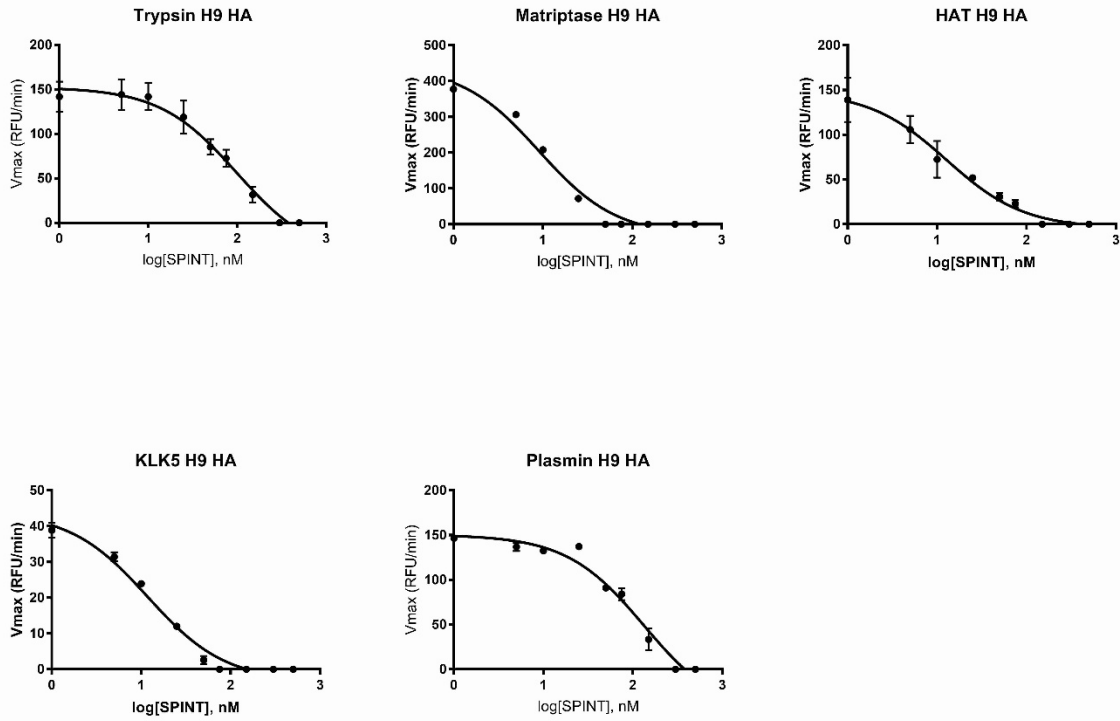

610

I

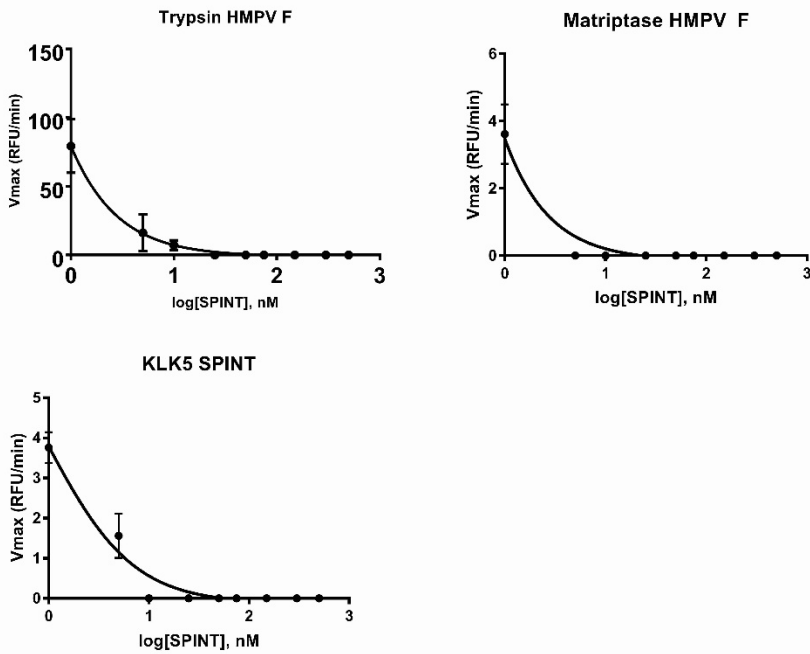

611
